# Supplementary material for: The infrared spectrum of protonated buckminsterfullerene C60H+
Source: Springer Nature journal article supplement (doi:10.1038/s41550-019-0941-6), 2019-11-25
Supplement: 41550_2019_941_MOESM1_ESM.pdf [file 41550_2019_941_MOESM1_ESM.pdf]

In the format provided by the authors and unedited.

# The infrared spectrum of protonated buckminsterfullerene $C_{60}H^+$

Julianna Palotás<sup>1</sup>, Jonathan Martens <sup>1</sup>, Giel Berden <sup>1</sup> and Jos Oomens <sup>1,2\*</sup>

---

<sup>1</sup>Radboud University, Institute for Molecules and Materials, FELIX Laboratory, Nijmegen, The Netherlands. <sup>2</sup>van 't Hoff Institute for Molecular Sciences, University of Amsterdam, Amsterdam, The Netherlands. \*e-mail: [j.oomens@science.ru.nl](mailto:j.oomens@science.ru.nl)

# The infrared spectrum of protonated buckminsterfullerene, $C_{60}H^+$

## Supplementary Information

Julianna Palotás,<sup>1</sup> Jonathan Martens,<sup>1</sup> Giel Berden,<sup>1</sup> and Jos Oomens<sup>1,2, a)</sup>

<sup>1</sup>*Radboud University, Institute for Molecules and Materials, FELIX Laboratory, Toernooiveld 7, 6525ED Nijmegen, The Netherlands*

<sup>2</sup>*van 't Hoff Institute for Molecular Sciences, University of Amsterdam, Science Park 908, 1098XH Amsterdam, The Netherlands*

### ENDOHEDRAL VERSUS EXOHEDRAL PROTONATION

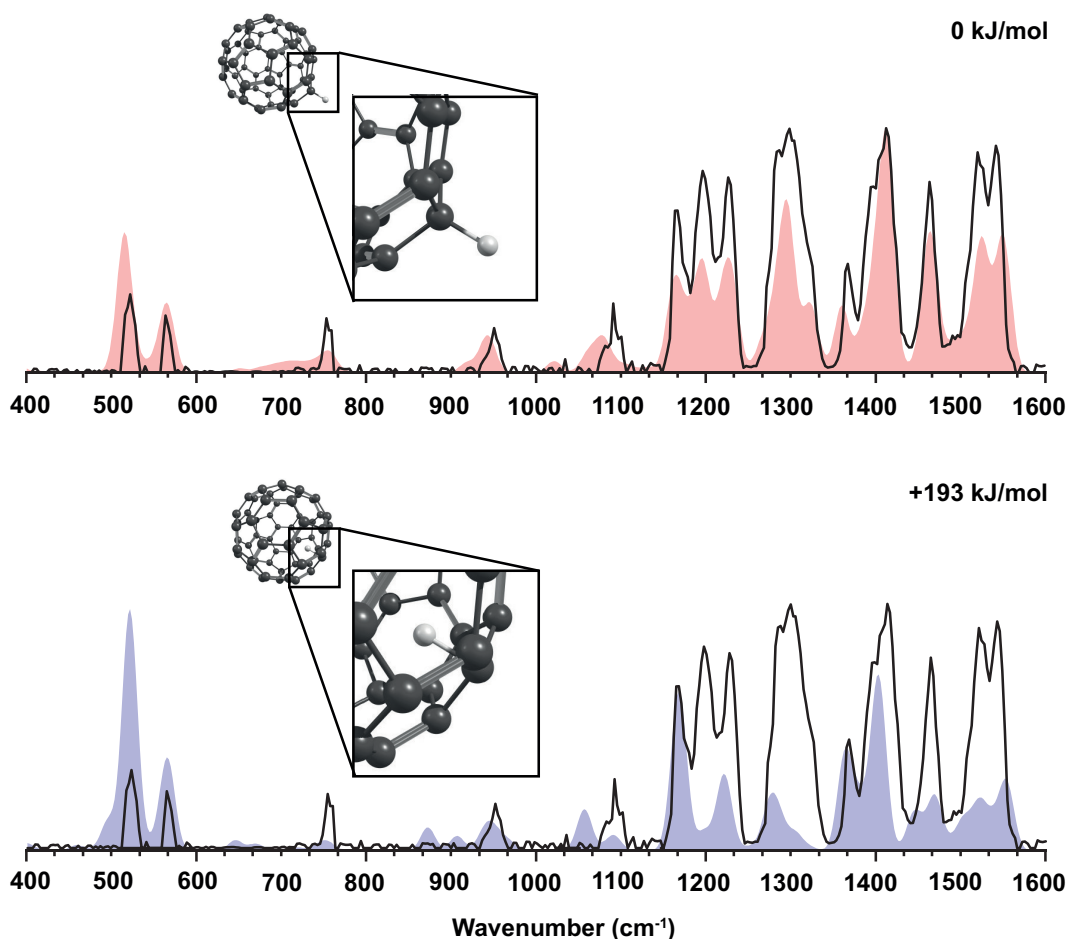

Supplementary Figure 1. Comparison of computed spectra (B3LYP/6-311+G(d,p)) for the two possible protonation sites: exohedral (top) or endohedral (bottom). Clearly, the experimental versus theoretical match is better for the exohedral structure. Relative Gibbs energies for the two structures, given in each panel in kJ/mol, also strongly favor the exohedral geometry.

<sup>a)</sup> Corresponding author: j.oomens@science.ru.nl

## SPECTRAL COMPARISONS

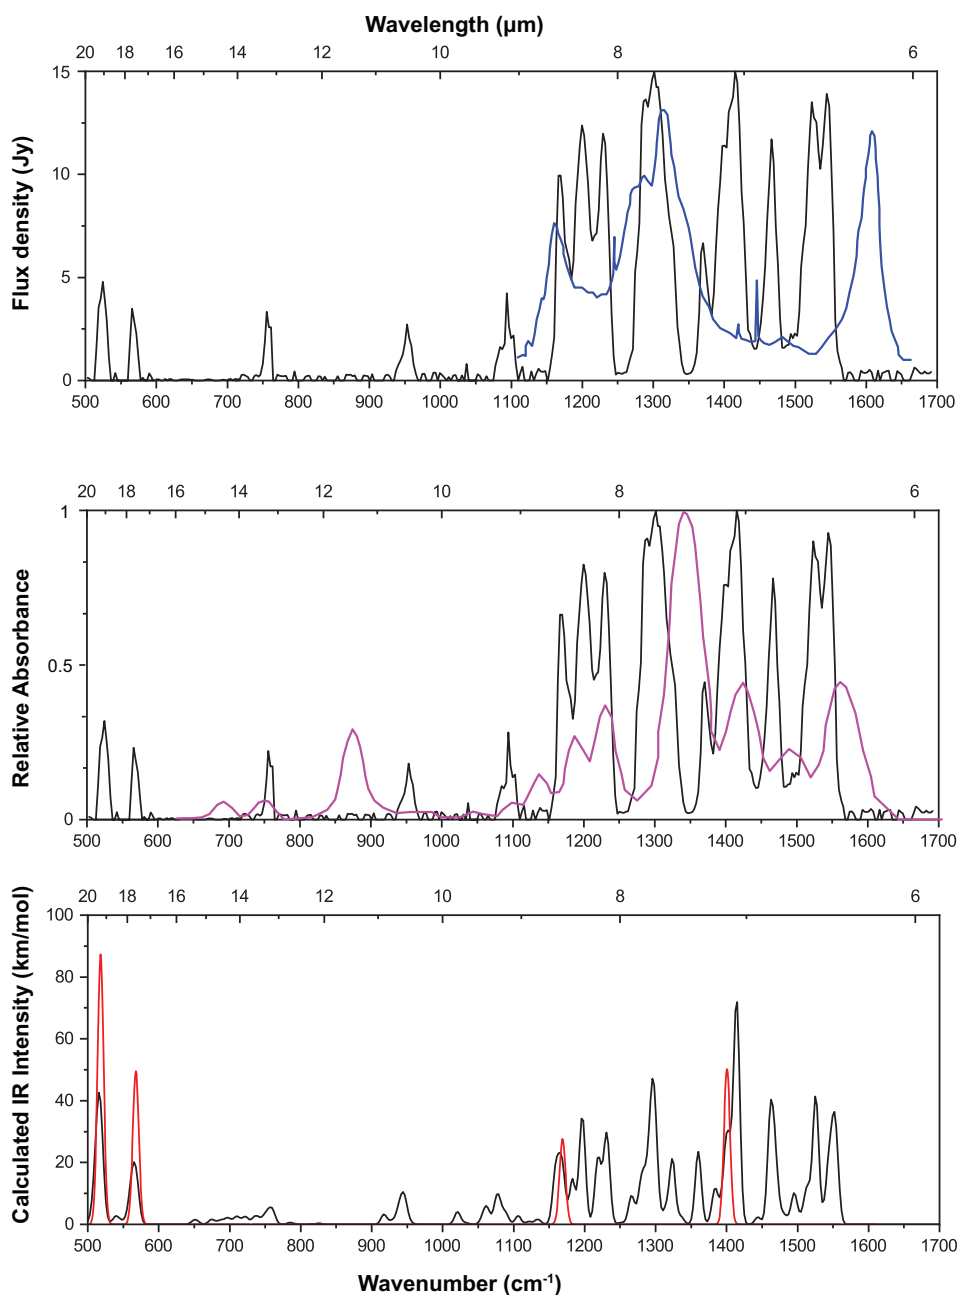

Supplementary Figure 2. **Top panel:** Comparison of the laboratory spectrum of C<sub>60</sub>H<sup>+</sup> (black) with an emission spectrum of NGC7023 obtained with the SWS spectrograph on board ISO (blue) with main features observed being attributed to PAHs.<sup>1</sup> **Middle panel:** Comparison with average theoretical spectrum of six cationic PAHs (anthracene, tetracene, 1,2-benzanthracene, chrysene, pyrene, and coronene).<sup>2</sup> Both spectra are clearly distinct from the C<sub>60</sub>H<sup>+</sup> spectrum. The bottom panel contrasts the theoretical spectra of C<sub>60</sub> (red) and C<sub>60</sub>H<sup>+</sup> (black).

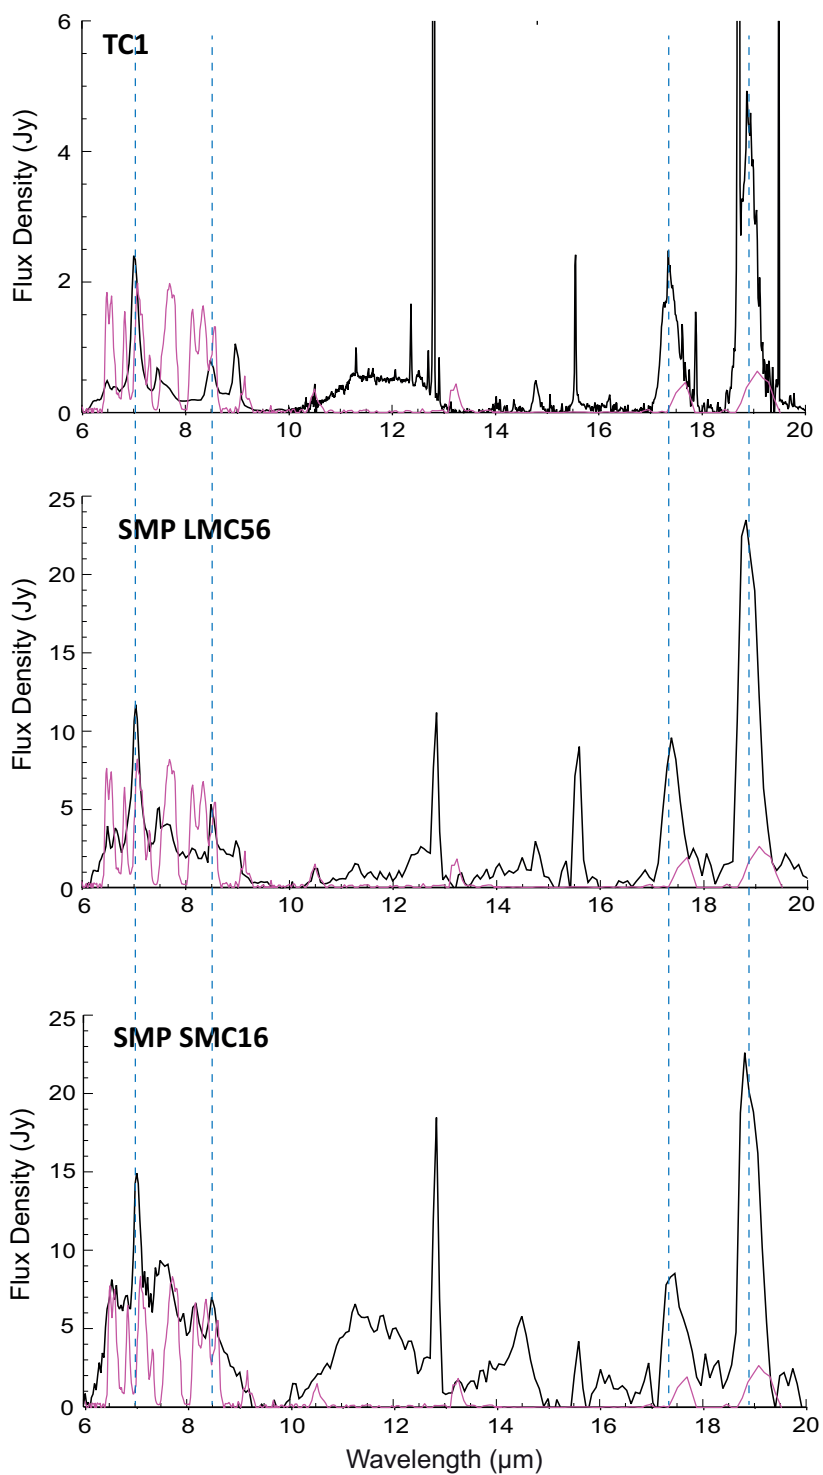

Supplementary Figure 3. Comparison of the laboratory spectrum of  $\text{C}_{60}\text{H}^+$  with astronomical emission spectra observed from the planetary nebulae TC1, SMP SMC56, and SMP LMC16.<sup>3,4</sup> Dashed lines indicate band positions for neutral  $\text{C}_{60}$ .

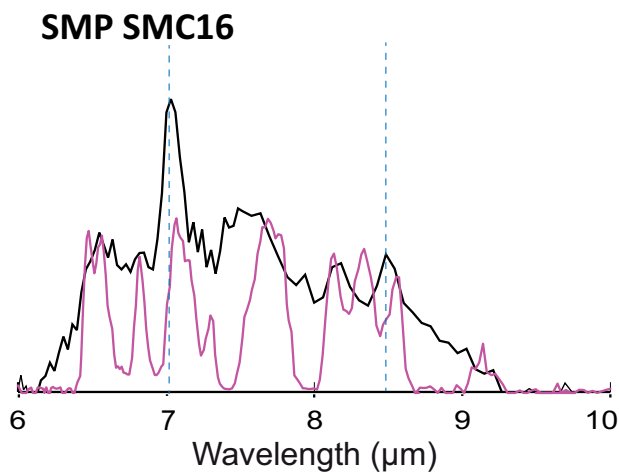

Supplementary Figure 4. Detailed comparison of the laboratory spectrum of  $C_{60}H^+$  with Spitzer-IRS spectrum from the SMP SMC16 planetary nebula.<sup>3,4</sup> Dashed lines indicate band positions for neutral  $C_{60}$ .

#### CALCULATED IR SPECTRA AT DIFFERENT LEVELS OF DFT

Supplementary Table 1. Experimental band centers and band centers of the convoluted computed spectra (see Fig. 3 in the main text). The used scaling factor is shown for each computational method. The RMS deviation from the experimental band centers is given for each of the computational methods.

| Method                       | IRMPD       | B3LYP/<br>3-21G<br>(0.9650) | $\Delta$ | B3LYP/<br>4-31G<br>(0.9752) | $\Delta$ | BP86/<br>4-31G<br>(1.0033) | $\Delta$ | B3LYP/<br>6-311+G(p,d)<br>(0.9679) | $\Delta$ | M06-2X/<br>6-311+G(p,d)<br>(0.9520) | $\Delta$ |
|------------------------------|-------------|-----------------------------|----------|-----------------------------|----------|----------------------------|----------|------------------------------------|----------|-------------------------------------|----------|
| Band center<br>( $cm^{-1}$ ) | 524         | 497.5                       | 26.5     | 537.1                       | -13.1    | 522.5                      | 1.5      | 515.5                              | 8.5      | 510.2                               | 13.8     |
|                              | 566         | 560.8                       | 5.2      | 572.3                       | -6.3     | 572.9                      | -6.9     | 565.3                              | 0.7      | 567.1                               | -1.1     |
|                              | 756         | 758.6                       | -2.6     | 768.4                       | -12.4    | 769.8                      | -13.8    | 754.7                              | 1.3      | 757.8                               | -1.8     |
|                              | 953         | 943.6                       | 9.4      | 957                         | -4       | 961.6                      | -8.6     | 944.1                              | 8.9      | 938.7                               | 14.3     |
|                              | 1094        | 1072.9                      | 21.1     | 1092.8                      | 1.2      | 1100.5                     | -6.5     | 1076.2                             | 17.8     | 1065                                | 29       |
|                              | 1167        | 1169.2                      | -2.2     | 1185.8                      | -18.8    | 1186.3                     | -19.3    | 1165.9                             | 1.1      | 1166.5                              | 0.5      |
|                              | 1199        | 1184.4                      | 14.6     | 1211                        | -12      | 1206.5                     | -7.5     | 1195.8                             | 3.2      | 1203.7                              | -4.7     |
|                              | 1229        | 1209.8                      | 19.2     | 1238.6                      | -9.6     | 1236.8                     | -7.8     | 1225.7                             | 3.3      | 1235.9                              | -6.9     |
|                              | 1301        | 1295.9                      | 5.1      | 1319.1                      | -18.1    | 1322.6                     | -21.6    | 1295.4                             | 5.6      | 1285.4                              | 15.6     |
|                              | 1370        | 1356.8                      | 13.2     | 1387                        | -17      | 1398.3                     | -28.3    | 1360.2                             | 9.8      | 1369.6                              | 0.4      |
|                              | 1415        | 1425.2                      | -10.2    | 1447.3                      | -32.3    | 1423                       | -8       | 1412.6                             | 2.4      | 1424.1                              | -9.1     |
|                              | 1467        | 1470.8                      | -3.8     | 1495.1                      | -28.1    | 1499.3                     | -32.3    | 1464.9                             | 2.1      | 1478.6                              | -11.6    |
|                              | 1523        | 1536.8                      | -13.8    | 1558                        | -35      | 1552.3                     | -29.3    | 1524.7                             | -1.7     | 1543.3                              | -20.3    |
|                              | 1545        | 1562.1                      | -17.1    | 1580.6                      | -35.6    | 1572.4                     | -27.4    | 1549.6                             | -4.6     | 1570.3                              | -25.3    |
|                              | <b>RMSD</b> |                             |          | 3.68                        |          | 5.49                       |          | 4.96                               |          | 1.83                                |          |

- **Supplementary Data 1:** The IRMPD spectrum of  $C_{60}H^+$  in ASCII format.
- **Supplementary Data 2:** Calculated IR spectrum for the exohedral  $C_{60}H^+$  geometry in ASCII format. Harmonic vibrational frequencies and intensities are calculated at the B3LYP/6-311+G(d,p) level of theory. No frequency scaling has been applied to these values.
- **Supplementary Data 3:** Calculated IR spectrum for the endohedral  $C_{60}H^+$  geometry in ASCII format. Harmonic vibrational frequencies and intensities are calculated at the B3LYP/6-311+G(d,p) level of theory. No frequency scaling has been applied to these values.
- **Supplementary Data 4:** Optimized geometry of  $C_{60}H^+$  (exohedral) at the B3LYP/6-311+G(d,p) level of theory.

## REFERENCES

- <sup>1</sup>Peeters, E. *et al.* The rich 6 to 9  $\mu\text{m}$  spectrum of interstellar PAHs. *Astron. Astrophys.* **390**, 1089-1113 (2002)
- <sup>2</sup>L. J. Allamandola, L. J., Hudgins, D. M. & Sandford, S. A. Modeling the unidentified infrared emission with combinations of polycyclic aromatic hydrocarbons. *Astrophys. J.* **511**, L115-L119 (1999)
- <sup>3</sup>Bernard-Salas, J. *et al.* On the excitation and formation of circumstellar fullerenes. *Astrophys. J.* **757**, 41 (2012)
- <sup>4</sup>Candian, A. *et al.* Searching for stable fullerenes in space with computational chemistry. *Mon. Not. R. Astron. Soc.* **485**, 1137-1146 (2019)
